# Supplementary material
Source: PubMed Central journal article supplement (PMC6556381)
Supplement: NIHMS1026436-supplement-1.pdf [file NIHMS1026436-supplement-1.pdf]

Supplementary Table 1

| Gene name | Tagging method | Cell line                                      | Source                                                 | Cells analyzed after quality control | Number of independent experiments |
|-----------|----------------|------------------------------------------------|--------------------------------------------------------|--------------------------------------|-----------------------------------|
| KIF11     | BAC            | HK cDNA H2B-mCherry BAC mKIF11-GFP #2354       | A. Hyman, MPI-CBG Dresden, Germany <sup>26</sup>       | 14                                   | 2                                 |
| MIS12     | BAC            | HK BAC mMIS12-LAP cDNA H2B-mCherry cDNA #2341  | A. Hyman, MPI-CBG Dresden, Germany <sup>53</sup>       | 35                                   | 5                                 |
| TUBB4B    | BAC            | HK cDNA H2B-mCherry BAC mTUBB4B-LAP #2637      | A. Hyman, MPI-CBG Dresden, Germany <sup>53</sup>       | 28                                   | 5                                 |
| RACGAP1   | BAC            | HK cDNA H2B-mCherry BAC LAP-mRACGAP1 #2362     | A. Hyman, MPI-CBG Dresden, Germany <sup>53</sup>       | 18                                   | 4                                 |
| CDCA8     | BAC            | HK cDNA H2B-mCherry BAC mCDCA8-LAP #2607       | A. Hyman, MPI-CBG Dresden, Germany <sup>53</sup>       | 13                                   | 2                                 |
| NEDD1     | BAC            | HK cDNA H2B-mCherry BAC mNEDD1-LAP #311        | A. Hyman, MPI-CBG Dresden, Germany <sup>53</sup>       | 28                                   | 4                                 |
| CENPA     | cDNA           | HK cDNA EGFP-CENPA cDNA H2B-mCherry pool       | T. Hirota, Cancer Institute Tokyo, Japan <sup>28</sup> | 21                                   | 4                                 |
| NES       | cDNA           | HK cDNA H2B-mCherry cDNA NES-mEGFP2 pool       | J. Ellenberg/EMBL, this work                           | 17                                   | 4                                 |
| PLK1      | ZFN            | HK ZFN PLK1-mEGFP #24 cDNA H2B-mCherry pool    | J. Ellenberg/EMBL, this work                           | 16                                   | 3                                 |
| AURKB     | ZFN            | HK ZFN AURKB-mEGFP #H24 cDNA H2B-mCherry pool  | J. Ellenberg/EMBL <sup>29</sup>                        | 14                                   | 4                                 |
| BUB1      | CRISPR         | HK CRISPR mEGFP-BUB1 #63 cDNA H2B-mCherry pool | J. Ellenberg/EMBL, this work                           | 12                                   | 2                                 |
| NUP107    | ZFN            | HK 2xZFN mEGFP-NUP107 #26, 31                  | J. Ellenberg/EMBL <sup>16</sup>                        | 16                                   | 4                                 |
| RANBP2    | CRISPR         | HK CRISPR mEGFP-NUP358/RANBP2 #97              | J. Ellenberg/EMBL this work                            | 22                                   | 3                                 |
| NUP214    | CRISPR         | HK CRISPR mEGFP-NUP214 #2-12                   | J. Ellenberg/EMBL, this work                           | 14                                   | 5                                 |
| TPR       | CRISPR         | HK CRISPR TPR-mEGFP #171                       | J. Ellenberg/EMBL, this work                           | 15                                   | 3                                 |
| CEP192    | ZFN            | HK ZFN CEP192-mEGFP #15                        | J. Ellenberg/EMBL, this work                           | 13                                   | 2                                 |
| CEP250    | CRISPR         | HK CRISPR CEP250-mEGFP #1A-142                 | J. Ellenberg/EMBL, this work                           | 19                                   | 3                                 |
| NCAPH2    | CRISPR         | HK CRISPR mEGFP-NCAPH2 #1                      | J. Ellenberg/EMBL <sup>30</sup>                        | 20                                   | 3                                 |
| TOP2A     | CRISPR         | HK CRISPR mEGFP-TOP2A #102                     | J. Ellenberg/EMBL, this work                           | 16                                   | 3                                 |
| KIF4A     | CRISPR         | HK CRISPR mEGFP-KIF4A #173                     | J. Ellenberg/EMBL, this work                           | 21                                   | 4                                 |
| WAPL      | CRISPR         | HK CRISPR WAPL-EGFP                            | J.M. Peters/IMP <sup>31</sup>                          | 12                                   | 3                                 |
| STAG1     | CRISPR         | HK CRISPR STAG1-EGFP #H8                       | J.M. Peters/IMP, this work                             | 22                                   | 3                                 |
| STAG2     | CRISPR         | HK CRISPR STAG2-EGFP #F2                       | J.M. Peters/IMP, this work                             | 13                                   | 3                                 |
| RAD21     | CRISPR         | HK CRISPR RAD21/SCC1-EGFP                      | J.M. Peters/IMP <sup>32</sup>                          | 18                                   | 3                                 |
| CTCF      | CRISPR         | HK CRISPR CTCF-EGFP #F2                        | J.M. Peters/IMP, this work                             | 16                                   | 3                                 |
| BUB1B     | CRISPR         | HK CRISPR EGFP-BUB1B #M04-A03                  | J.M. Peters/IMP, this work                             | 20                                   | 3                                 |
| ANAPC2    | CRISPR         | HK CRISPR mEGFP-ANAPC2 #M21-P1-A11             | J.M. Peters/IMP, this work                             | 14                                   | 3                                 |
| MAD2L1    | CRISPR         | HK CRISPR MAD2L1-EGFP #M11-B11                 | J.M. Peters/IMP, this work                             | 10                                   | 2                                 |

The LAP tag has EGFP as fluorescent protein. The reference number refer to the references in the Methods of Cai, Hossain, et al. 2018

**Supplementary Table 2**

| Gene   | Genome editing tool | Sequences                                    |
|--------|---------------------|----------------------------------------------|
| AURKB  | ZFN                 | CGCCTGATGGTCCCTgtcattCACTCGGGTGCGTGTGTT      |
| PLK1   | ZFN                 | TCGGCCAGCAACCGTCTCaaggccTCCTAATAGCTGCCC      |
| CEP192 | ZFN                 | CTTGTCATTCAAACAGATGaaggcaAGAGTATTGCTATTCCG   |
| NUP107 | ZFN                 | TCAGTACTGATGgtggcaGCTGAGCCCGAAGTC            |
| BUB1   | CRISPR/Cas9D10A     | ACCAGACGGACACTTACTGA<br>GGGCGCCTGGGGTTCGGGCC |
| RANBP2 | CRISPR/Cas9D10A     | GGCGCGTGAGACCAGCGCTC<br>GAGGCGCAGCAAGGCTGACG |
| NUP214 | CRISPR/Cas9D10A     | GCAGCCAACGCTGCCTCCCA<br>CGGCGCGATGGGAGACGAGA |
| TPR    | CRISPR/Cas9D10A     | CTCCTCTCCCTCCCATTGCA<br>CAGAGGAAATATTAATTTAA |
| CEP250 | CRISPR/Cas9D10A     | CTGCTACCTGGAGGCGGCTT<br>ACAGACAGAAGACTGTGTCA |
| MAD2L1 | CRISPR/Cas9D10A     | GTCATCCTCAGTCATTGAC<br>TAATTGTAATTTTGAATG    |
| BUB1B  | CRISPR/Cas9D10A     | CGCCGCCATCCTGCATTCC<br>GGTGCTCTGAGGTAGGTAC   |
| ANAPC2 | CRISPR/Cas9D10A     | CGCAGCCATGACGCGCACA<br>CGCCGCGCCGAGCGAATCT   |
| RAD21  | CRISPR/Cas9D10A     | CTTATATAATATGGAACCT<br>CAAATTGCCCCCATGTGTA   |
| STAG1  | CRISPR/Cas9D10A     | TCTTCAGACTTCAGAACAT<br>GTTTCTCATCATTTTTCTA   |
| STAG2  | CRISPR/Cas9D10A     | CACAGATTTAATTGTGTAC<br>CTCTCTCTCATTAGTTCT    |
| CTCF   | CRISPR/Cas9D10A     | GAGGATCATCTCGGGCGTG<br>CAGCATGATGGACCGGTGA   |
| WAPL   | CRISPR/Cas9D10A     | CTAAGGGTAGTCCGTTTGT<br>TGGGGAGAGACCACATTTA   |
| NCAPH2 | CRISPR/Cas9D10A     | ACCGCAGGGCTGCCTTCCGA<br>CCGTTCCCTCCCGGACATGG |

ZFN cut sites are indicated in lower case. For CRISPR/Cas9 editing, the first sequence is the antisense gRNA binding site, the second one is the sense gRNA binding site (double nicking approach).

## SUPPLEMENTARY REFERENCES

26. Maliga, Z. *et al.* A genomic toolkit to investigate kinesin and myosin motor function in cells. *Nat. Cell Biol.* **15**, 325–334 (2013).
27. Hutchins, J. R. *et al.* Systematic analysis of human protein complexes identifies chromosome segregation proteins. *Science (80-. )*. **328**, 593–599 (2010).
28. Kunitoku, N. *et al.* CENP-A phosphorylation by Aurora-A in prophase is required for enrichment of Aurora-B at inner centromeres and for kinetochore function. *Dev. Cell* **5**, 853–64 (2003).
29. Mahen, R. *et al.* Comparative assessment of fluorescent transgene methods for quantitative imaging in human cells. *Mol. Biol. Cell* **25**, 3610–3618 (2014).
30. Walther, N. *et al.* A quantitative map of human Condensins provides new insights into mitotic chromosome architecture. *J. Cell Biol.* **217**, 2309–2328 (2018).
31. Ladurner, R. *et al.* Sororin actively maintains sister chromatid cohesion. *EMBO J.* **35**, 635–653 (2016).
32. Davidson, I. F. *et al.* Rapid movement and transcriptional re-localization of human cohesin on DNA. *EMBO J.* **35**, 2671–2685 (2016).
33. Neumann, B. *et al.* Phenotypic profiling of the human genome by time-lapse microscopy reveals cell division genes. *Nature* **464**, 721–727 (2010).
34. Bancaud, A. *et al.* Molecular crowding affects diffusion and binding of nuclear proteins in heterochromatin and reveals the fractal organization of chromatin. *EMBO J.* **28**, 3785–98 (2009).
35. Li, C. H. & Lee, C. K. Minimum cross entropy thresholding. *Pattern Recognit.* **26**, 617–625 (1993).
36. Heriche, J.-K. *et al.* Integration of biological data by kernels on graph nodes allows prediction of new genes involved in mitotic chromosome condensation. *Mol. Biol. Cell* **25**, 2522–2536 (2014).
37. Otsu, N. A Threshold Selection Method from Gray-Level Histograms. *IEEE Trans. Syst. Man. Cybern.* **9**, 62–66 (1979).
38. Meyer, F. Topographic distance and watershed lines. *Signal Processing* **38**, 113–125 (1994).
39. Wachsmuth, M. *et al.* High-throughput fluorescence correlation spectroscopy enables analysis of proteome dynamics in living cells. *Nat Biotechnol* **33**, 384–389 (2015).
40. Ori, A. *et al.* Cell type-specific nuclear pores: a case in point for context-dependent stoichiometry of molecular machines. *Mol Syst Biol* **9**, 648 (2013).
41. Barton, G. J. & Sternberg, M. J. E. A strategy for the rapid multiple alignment of protein sequences. Confidence levels from tertiary

- structure comparisons. *J. Mol. Biol.* **198**, 327–337 (1987).
42. ten Holt, G., Reinders, M. & Hendriks, E. Multi-Dimensional Dynamic Time Warping for Gesture Recognition. in *Thirteenth annual conference of the Advanced School for Computing and Imaging* (2007).
  43. Keys, R. Cubic convolution interpolation for digital image processing. *IEEE Trans. Acoust.* **29**, 1153–1160 (1981).
  44. Lazebnik, S., Schmid, C. & Ponce, J. A sparse texture representation using local affine regions. *IEEE Transactions on Pattern Analysis and Machine Intelligence* **27**, 1265–1278 (2005).
  45. Heikkilä, M. & Pietikäinen, M. A texture-based method for modeling the background and detecting moving objects. *IEEE Trans. Pattern Anal. Mach. Intell.* **28**, 657–662 (2006).
  46. Tran, T. N., Drab, K. & Daszykowski, M. Revised DBSCAN algorithm to cluster data with dense adjacent clusters. *Chemom. Intell. Lab. Syst.* **120**, 92–96 (2013).
  47. Jolliffe, I. T. Principal Component Analysis. *Principal Component Analysis* (2002).
  48. Lee, D. D. & Seung, H. S. Learning the parts of objects by non-negative matrix factorization. *Nature* **401**, 788–791 (1999).
  49. Cichocki, A., Zdunek, R., Phan, A. H. & Amari, S.-I. *Nonnegative Matrix and Tensor Factorizations*. (John Wiley & Sons, Ltd, 2009).  
doi:10.1002/9780470747278
  50. Tucker, L. R. A method for synthesis of factor analysis studies. *Pers. Res. Sect. Rep.* **984**, (1951).
  51. Aitchison, J. *The statistical analysis of compositional data*. (Blackburn Press, 2003).
  52. Williams, E. *et al.* Image Data Resource: A bioimage data integration and publication platform. *Nat. Methods* **14**, 775–781 (2017).
  53. Hutchins, J. R. *et al.* Systematic analysis of human protein complexes identifies chromosome segregation proteins. *Science* **328**, 593–599 (2010).
